# Supplementary material
Source: PubMed Central journal article supplement (PMC4810863)
Supplement: rspb20153008supp1.pdf [file rspb20153008supp1.pdf]

# **Selective logging in tropical forests decreases the robustness of liana-tree interaction networks to the loss of host tree species**

## **Supplementary Online Material**

**Ainhoa Magrach<sup>1,2,3\*\*</sup>, Rebecca Senior<sup>4\*</sup>, Andrew Rogers<sup>4\*</sup>, Deddy Nurdin<sup>5</sup>, Suzan Benedic<sup>6</sup>,  
William F. Laurance<sup>2</sup>, Luis Santamaria<sup>3</sup>, David P. Edwards<sup>2,4</sup>**

<sup>1</sup> Institute of Terrestrial Ecosystems, ETH Zürich, CHN G 74.2 Universitätstrasse 16, 8092 Zürich, Switzerland

<sup>2</sup> Centre for Tropical Environmental and Sustainability Science (TESS) and College of Marine and Environmental Sciences, James Cook University, Cairns, Queensland 4878, Australia

<sup>3</sup> Doñana Biological Station (EBD-CSIC), Spain

<sup>4</sup> Department of Animal and Plant Sciences, University of Sheffield, Western Bank, Sheffield, S10 2TN, UK

<sup>5</sup> South-east Asia Rainforest Research Program, Danum Valley Field Centre, Borneo, Malaysia

<sup>6</sup> School of Sustainable Agriculture, Universiti Malaysia Sabah, Malaysia

\*Authors contributed equally

\*\*Correspondence author. E-mail: [ainhoamagrach@hotmail.com](mailto:ainhoamagrach@hotmail.com)

## Extended Methodology

### *Liana and tree biomass estimations*

For each plot, we calculated both liana and tree biomasses. For liana biomass we used the following equation [1]:

$$AGB = \exp[-1.484 + 2.657 \ln(D)], \quad [\text{Eqn. 1}]$$

where AGB is the predicted aboveground oven-dry weight of the liana in kilograms and D is the diameter in cm at 130 cm from the roots. For tree biomass we applied the following equation proposed for moist forest stands [2]:

$$(AGB)_{est} = \rho * \exp(-1.499 + 2.148 * \ln(D) + 0.207 * \ln(D))^2 - 0.0281 * \ln(D))^3) \quad [\text{Eqn. 2}]$$

where AGB is aboveground biomass,  $\rho$  is wood density measured in  $\text{g/cm}^3$  and D is the DBH measured at 130 cm from the forest ground.

We obtained estimates of wood density for the tree species surveyed from the Global Wood Density Database [3]. For species that did not appear in the dataset or individuals only identified to genus level, we used the average for the nearest taxonomic group available for the region (genus or family). We then calculated average tree and liana biomasses per plot as well as the percent of the total biomass (tree and liana) contributed by lianas.

**Table S1:** List of tree and liana species (or morphospecies) used in quantitative interaction networks with code for figure depicting network structure, Fig. 3.

a)

| Tree species                                  | ID network figure |
|-----------------------------------------------|-------------------|
| <i>Primary forest</i>                         |                   |
| <i>Adinandra dumosa</i> Jack                  |                   |
| <i>Aglaia elliptica</i> Blume                 | T1                |
| <i>Aglaia macrocarpa</i> (Miq.) Pannell       | T2                |
| <i>Aglaia odoratissima</i> Bl.                | T3                |
| <i>Aglaia</i> sp.                             | T4                |
| <i>Alangium javanicum</i> (Bl.) Wang          |                   |
| <i>Aporusa elmeri</i> Merr.                   | T5                |
| <i>Aporusa grandifolia</i> Merr.              | T6                |
| <i>Aporusa grandistipula</i> Merr.            | T7                |
| <i>Aporusa nitida</i> Merr.                   | T8                |
| <i>Aquilaria malaccensis</i> Lamk.            |                   |
| <i>Ardisia elliptica</i> Thunb.               |                   |
| <i>Ardisia</i> sp.                            |                   |
| <i>Artocarpus</i> sp.                         |                   |
| <i>Baccaurea macrocarpa</i> Müll.Arg.         | T9                |
| <i>Baccaurea</i> sp.                          |                   |
| <i>Baccaurea stipulata</i> J.J.Sm.            | T10               |
|                                               | T11               |
| <i>Baccaurea tetrandra</i> (Baill.) Mull.Arg. |                   |
| <i>Barringtonia macrostachya</i> (Jack) Kurz  | T12               |
| <i>Blumeodendron tokbrai</i> (Bl.) Kurz       | T13               |
| <i>Brownlowia peltata</i> Benth.              |                   |
| <i>Canarium denticulatum</i> Blume            | T14               |
| <i>Canarium odontophyllum</i> Miq.            |                   |
| <i>Canarium</i> sp.                           |                   |
| <i>Castanopsis mottleyana</i> King            | T15               |
| <i>Chionanthus pluriflorus</i> (Knobl.) Kiew  |                   |
| <i>Chisocheton patens</i> Blume               |                   |
| <i>Chisocheton</i> sp.                        |                   |
| <i>Cynometra elmeri</i> Merr.                 | T16               |
| <i>Dehaasia</i> sp.                           |                   |
| <i>Dillenia excelsa</i> (Jack) Martelli       |                   |
| <i>Dimocarpus longan</i> Lour.                |                   |
| <i>Diospyros frutescens</i> Blume             |                   |
| <i>Diospyros macrophylla</i> Blume            |                   |
| <i>Diospyros</i> sp.                          | T17               |
| <i>Diospyros tuberculata</i> Bakh.            | T18               |
| <i>Dipterocarpus caudiferus</i> Merr.         |                   |
| <i>Dryobalanops lanceolata</i> Burck          |                   |
| <i>Elaeocarpus stipularis</i> Bl.             |                   |
| <i>Endospermum diadenum</i> (Miq.) Airy Shaw  |                   |
| <i>Eugenia</i> sp.                            |                   |

|                                                                       |     |
|-----------------------------------------------------------------------|-----|
| <i>Eusideroxylon zwageri</i> Teijsm. & Binn.                          | T19 |
| <i>Ficus</i> sp.                                                      |     |
| <i>Ficus variegata</i> Bl.                                            |     |
| <i>Fordia</i> sp.                                                     |     |
| <i>Fordia splendidissima</i> (Miq.) Buijsen                           |     |
| <i>Garcinia parvifolia</i> (Miq.) Miq.                                |     |
| <i>Garcinia</i> sp.                                                   |     |
| <i>Glochidion borneensis</i> Boerl.                                   | T20 |
| <i>Gluta</i> sp.                                                      |     |
| <i>Hopea ferruginea</i> Parijs                                        |     |
| <i>Hopea nervosa</i> King                                             |     |
| <i>Hopea sangal</i> Korth.                                            | T21 |
| <i>Hydnocarpus borneensis</i> Sleum.                                  |     |
| <i>Ixora grandifolia</i> Zoll. & Moritz                               | T22 |
| <i>Kibara obtusa</i> Bl.                                              |     |
| <i>Knema laurina</i> (Bl.) Warb.                                      | T23 |
| <i>Knema</i> sp.                                                      |     |
| <i>Koilocarpus longifolium</i> Hook. F.                               | T24 |
| <i>Lansium domesticum</i> Corrêa                                      | T25 |
| <i>Lithocarpus gracilis</i> (Korth.) Soepadmo                         |     |
| <i>Litsea caulocarpa</i> Merr.                                        |     |
| <i>Litsea</i> sp.                                                     | T26 |
| <i>Lophopetalum javanicum</i> (Zoll.) Turcz                           | T27 |
| <i>Ludeckia borneensis</i> Ridsdale                                   |     |
| <i>Luvunga heterophylla</i> Merr.                                     |     |
| <i>Maasia sumatrana</i> (Miq.) Mols, Keßler & Rogstad                 | T28 |
| <i>Madhuca kingiana</i> (Brace ex King & Gamble) H.J. Lam             |     |
| <i>Madhuca motleyana</i> (de Vriese) J.F. Macbr.                      |     |
| <i>Madhuca</i> sp.                                                    | T29 |
| <i>Magnolia montana</i> (Blume) Figlar                                |     |
| <i>Mallotus lackeyi</i> Elmer                                         |     |
| <i>Mallotus penangensis</i> (Müll.Arg.) S.E.C. Sierra, Kulju & Welzen | T30 |
| <i>Mallotus</i> sp.                                                   | T31 |
| <i>Mallotus wrayii</i> King ex. Hook                                  | T32 |
| <i>Mangifera</i> sp.                                                  |     |
| <i>Microcos crassifolia</i> Burret                                    | T33 |
| <i>Neesia</i> sp.                                                     |     |
| <i>Nephelium maingayi</i> Hiern                                       |     |
| <i>Nephelium ramboutan-ake</i> (Labill.) P.W. Leenhouts               |     |
| <i>Ochanostachys amentaceae</i> Mast.                                 |     |
| <i>Paranephelium xestophyllum</i> Miq.                                |     |
| <i>Parashorea malaanonan</i> (Blanco) Merr.                           |     |
| <i>Parashorea tomentella</i> (Symington) Meijer                       |     |
| <i>Payena acuminata</i> (Blume) Pierre                                |     |
| <i>Pentace laxiflora</i> Merr.                                        | T34 |
| <i>Polyalthia insignis</i> (Hook. F.) Airy Shaw                       |     |
| <i>Polyalthia rumphii</i> (Bl.) Merr.                                 |     |
| <i>Polyalthia</i> sp.                                                 | T35 |
| <i>Polyalthia xanthopetala</i> Merr.                                  |     |
| <i>Popowia pisocarpa</i> (Blume) Endl.                                |     |
| <i>Pterospermum javanicum</i> Jungh.                                  |     |

|                                                              |     |
|--------------------------------------------------------------|-----|
| <i>Pterospermum stapfianum</i> Ridley                        |     |
| <i>Ryparosa acuminata</i> Merrill                            | T36 |
| <i>Semecarpus borneensis</i> Merrill                         | T37 |
| <i>Semecarpus</i> sp.                                        |     |
| <i>Scorodocarpus borneensis</i> Becc.                        |     |
| <i>Shorea agamii</i> P.S. Ashton                             |     |
| <i>Shorea argentifolia</i> Symington                         |     |
| <i>Shorea beccariana</i> Burck                               |     |
| <i>Shorea faguetiana</i> F. Heim                             | T38 |
| <i>Shorea gibbosa</i> Brandis                                |     |
| <i>Shorea johorensis</i> Foxw.                               | T39 |
| <i>Shorea leprosula</i> Miq.                                 |     |
| <i>Shorea leptoderma</i> Meijer                              |     |
| <i>Shorea macroptera</i> Dyer                                |     |
| <i>Shorea mecistopteryx</i> Ridl.                            |     |
| <i>Shorea ovata</i> Dyr ex Brandis                           |     |
| <i>Shorea pahangensis</i> Foxw.                              |     |
| <i>Shorea parvifolia</i> Dyer                                |     |
| <i>Shorea pauciflora</i> King                                | T40 |
| <i>Shorea superba</i> Symington                              | T41 |
| <i>Spathiostemon javanicum</i>                               | T42 |
| <i>Sympetalandra borneensis</i> Stapf                        |     |
| <i>Syzygium napiforme</i> (Koord. & Valet.) Merr. & Perry    |     |
| <i>Syzygium</i> sp.                                          | T43 |
| <i>Urophyllum glabrum</i> Wall.                              |     |
| <i>Vatica albiramis</i> Slooten                              |     |
| <i>Vatica dulitensis</i> Sym.                                | T44 |
| <i>Xanthophyllum affine</i> (Korth. ex Miq.) Kuntze          | T45 |
| <i>Xanthophyllum ellipticum</i> Korth. ex Miq.               |     |
| <i>Xanthophyllum</i> sp.                                     |     |
| <i>Ziziphus angustifolius</i> (Miq.) Hatusima ex van Steenis |     |
| <i>Logged forest</i>                                         |     |
| <i>Adinandra dumosa</i> Jack                                 |     |
| <i>Aglaia elliptica</i> Blume                                | T1  |
| <i>Aglaia macrocarpa</i> (Miq.) Pannell                      | T2  |
| <i>Aglaia odoratissima</i> Bl.                               | T3  |
| <i>Aglaia</i> sp.                                            | T4  |
| <i>Alangium javanicum</i> (Bl.) Wang                         |     |
| <i>Aporusa elmeri</i> Merr.                                  |     |
| <i>Aporusa grandistipula</i> Merr.                           |     |
| <i>Aporusa nitida</i> Merr.                                  |     |
| <i>Aquilaria malaccensis</i> Lamk.                           |     |
| <i>Ardisia</i> sp.                                           |     |
| <i>Ardisia dumetosa</i> Tutcher                              |     |
| <i>Artocarpus elasticus</i> Reinw. ex Blume                  | T5  |
| <i>Artocarpus</i> sp.                                        |     |
| <i>Baccaurea lanceolata</i> (Miq.) Mull. Arg.                | T6  |
| <i>Baccaurea stipulata</i> J.J.Sm.                           | T7  |
| <i>Baccaurea tetrandra</i> (Baill.) Mull.Arg.                | T8  |
| <i>Barringtonia macrostachya</i> (Jack) Kurz                 |     |
| <i>Beilschmiedia micrantha</i> Merr.                         |     |

|                                                      |     |
|------------------------------------------------------|-----|
| <i>Blumeodendrum tokbrai</i> (Bl.) Kurz              | T9  |
| <i>Brownlowia peltata</i> Benth.                     | T10 |
| <i>Callicarpa pentandra</i> Roxb.                    |     |
| <i>Canarium denticulatum</i> Blume                   | T11 |
| <i>Canarium odontophyllum</i> Miq.                   |     |
| <i>Castanopsis motleyana</i> King                    |     |
| <i>Chionanthus pluriflorus</i> (Knobl.) Kiew         |     |
| <i>Chisocheton</i> sp.                               | T12 |
| <i>Cratoxylum cochinchinense</i> (Lour.) Blume       | T13 |
| <i>Cratoxylum formosum</i> Benth. & Hook. F. ex Dyer |     |
| <i>Cynometra elmeri</i> Merr.                        |     |
| <i>Dehaasia</i> sp.                                  |     |
| <i>Dendrocnide elliptica</i> (Merr.) Chew            |     |
| <i>Dendrocnide</i> sp.                               |     |
| <i>Dillenia excelsa</i> (Jack) Martelli              | T14 |
| <i>Dimorphocalyx murinus</i> Elmer                   |     |
| <i>Diospyros ellipticifolia</i> (Stokes) Bakh.       |     |
| <i>Diospyros elliptica</i> P.S. Green                | T15 |
| <i>Diospyros frutescens</i> Blume                    |     |
| <i>Diospyros macrophylla</i> Blume                   | T16 |
| <i>Diospyros</i> sp.                                 | T17 |
| <i>Diospyros tuberculata</i> Bakh.                   | T18 |
| <i>Dipterocarpus caudiferus</i> Merr.                | T19 |
| <i>Dryobalanops lanceolata</i> Burck                 | T20 |
| <i>Duabanga moluccana</i> Blume                      |     |
| <i>Durio kutejensis</i> Hassk. & Becc.               |     |
| <i>Elaeocarpus stipularis</i> Bl.                    | T21 |
| <i>Endospermum diadenum</i> (Miq.) Airy Shaw         | T22 |
| <i>Endospermum</i> sp.                               |     |
| <i>Eusideroxylon zwageri</i> Teijsm. & Binn.         | T23 |
| <i>Ficus</i> sp.                                     |     |
| <i>Ficus virgate</i> Reinw. ex Blume                 |     |
| <i>Ficus variegata</i> Bl.                           |     |
| <i>Garcinia parvifolia</i> (Miq.) Miq.               |     |
| <i>Glochidion borneensis</i> Boerl.                  | T24 |
| <i>Glochidion</i> sp.                                | T25 |
| <i>Gluta</i> sp.                                     | T26 |
| <i>Gluta wallichii</i> (Hook.f.) Ding Hou            |     |
| <i>Hopea ferruginea</i> Parijs                       | T27 |
| <i>Hydnocarpus borneensis</i> Sleum.                 |     |
| <i>Ixora grandifolia</i> Zoll. & Moritz              |     |
| <i>Knema laurina</i> (Bl.) Warb.                     | T28 |
| <i>Knema pulchra</i> (Miq.) Warb.                    |     |
| <i>Koilocarpus longifolium</i> Hook. F.              | T29 |
| <i>Koompassia excelsa</i> (Becc.) Taub               | T30 |
| <i>Lansium domesticum</i> Corrêa                     | T31 |
| <i>Lithocarpus gracilis</i> (Korth.) Soepadmo        | T32 |
| <i>Litsea caulocarpa</i> Merr.                       | T33 |
| <i>Litsea micrantha</i> Merr.                        |     |
| <i>Litsea</i> sp.                                    | T34 |
| <i>Lophopetalum javanicum</i> (Zoll.) Turcz          |     |

|                                                                       |     |
|-----------------------------------------------------------------------|-----|
| <i>Ludeckia borneensis</i> Ridsdale                                   | T35 |
| <i>Maasia sumatrana</i> (Miq.) Mols, Keßler & Rogstad                 |     |
| <i>Macaranga digyna</i> (Wight) Müll. Arg.                            |     |
| <i>Macaranga gigantea</i> (Rchb.f. & Zoll.) Müll.Arg.                 |     |
| <i>Macaranga gigantifolia</i> Merr.                                   |     |
| <i>Macaranga hypoleuca</i> (Rchb.f. & Zoll.) Müll.Arg.                |     |
| <i>Macaranga pearsonii</i> Merr.                                      |     |
| <i>Macaranga</i> sp.                                                  |     |
| <i>Madhuca kingiana</i> (Brace ex King & Gamble) H.J.Lam              |     |
| <i>Madhuca motleyana</i> (de Vriese) J.F. Macbr.                      | T36 |
| <i>Madhuca</i> sp.                                                    | T37 |
| <i>Mallotus penangensis</i> (Müll.Arg.) S.E.C. Sierra, Kulju & Welzen | T38 |
| <i>Mallotus</i> sp.                                                   |     |
| <i>Mallotus wrayii</i> King ex. Hook                                  | T39 |
| <i>Mangifera</i> sp.                                                  | T40 |
| <i>Microcos crassifolia</i> Burret                                    | T41 |
| <i>Nauclea subdita</i> (Korth.) Steud.                                |     |
| <i>Neesia</i> sp.                                                     |     |
| <i>Neesia synandra</i> Mast.                                          |     |
| <i>Neolamarckia cadamba</i> (Roxb.) Bosser                            | T42 |
| <i>Nephelium maingayi</i> Hiern                                       |     |
| <i>Nephelium ramboutan-ake</i> (Labill.) P.W. Leenhouts               |     |
| <i>Ochanostachys amentaceae</i> Mast.                                 | T43 |
| <i>Octomeles sumatrana</i> Miq.                                       |     |
| <i>Paranephelium xestophyllum</i> Miq.                                | T44 |
| <i>Parashorea malaanonan</i> (Blanco) Merr.                           | T45 |
| <i>Parashorea tomentella</i> (Symington) Meijer                       | T46 |
| <i>Pentace laxiflora</i> Merr.                                        | T47 |
| <i>Pleiocarpidia sandakanica</i> Bremekamp                            |     |
| <i>Polyalthia cauliflora</i> Hook.f. & Thomson                        | T48 |
| <i>Polyalthia insignis</i> (Hook. F.) Airy Shaw                       |     |
| <i>Polyalthia rumphii</i> (Bl.) Merr.                                 | T49 |
| <i>Polyalthia</i> sp.                                                 | T50 |
| <i>Polyalthia sumatrana</i> (Miq.) Kurz                               |     |
| <i>Polyalthia xanthopetala</i> Merr.                                  | T51 |
| <i>Popowia pisocarpa</i> (Blume) Endl.                                | T52 |
| <i>Pternandra coerulescens</i> Jack                                   |     |
| <i>Pterospermum javanicum</i> Jungh.                                  |     |
| <i>Ryparosa acuminata</i> Merrill                                     | T53 |
| <i>Semecarpus borneensis</i> Merrill                                  |     |
| <i>Semecarpus</i> sp.                                                 |     |
| <i>Saurauia</i> sp.                                                   |     |
| <i>Scorodocarpus borneensis</i> Becc.                                 |     |
| <i>Shorea agamii</i> P.S. Ashton                                      |     |
| <i>Shorea beccariana</i> Burck                                        |     |
| <i>Shorea fallax</i> Meijer                                           |     |
| <i>Shorea gibbosa</i> Brandis                                         |     |
| <i>Shorea johorensis</i> Foxw.                                        | T54 |
| <i>Shorea leprosula</i> Miq.                                          |     |
| <i>Shorea ovata</i> Dyr ex Brandis                                    |     |
| <i>Shorea parvifolia</i> Dyer                                         |     |

|                                                              |     |
|--------------------------------------------------------------|-----|
| <i>Shorea pauciflora</i> King                                | T55 |
| <i>Shorea superba</i> Symington                              | T56 |
| <i>Sindora irpicina</i> de Wit                               | T57 |
| <i>Spathiostemon javanicum</i>                               | T58 |
| <i>Symplocos fasciculata</i> (Kuntze) Zoll.                  | T59 |
| <i>Syzygium</i> sp.                                          | T60 |
| <i>Terminalia citrina</i> (Gaertn) Roxb. Ex Fleming          | T61 |
| <i>Urophyllum</i> sp.                                        |     |
| <i>Xanthophyllum affine</i> (Korth. ex Miq.) Kuntze          | T62 |
| <i>Xanthophyllum ellipticum</i> Korth. ex Miq.               | T63 |
| <i>Ziziphus angustifolius</i> (Miq.) Hatusima ex van Steenis |     |

b)

| Liana species                                      | ID network figure |
|----------------------------------------------------|-------------------|
| <i>Primary forest</i>                              |                   |
| <i>Aglaia borneensis</i> Merr.                     |                   |
| <i>Artabotrys roseus</i> Boerl.                    | L1                |
| <i>Bauhinia</i> sp.                                | L2                |
| <i>Caesalpinia oppositifolia</i> Hattink           | L3                |
| <i>Caesalpinia</i> sp.                             |                   |
| <i>Cissus hastata</i> Miq.                         |                   |
| <i>Luvunga heterophylla</i> Merr.                  |                   |
| <i>Luvunga</i> sp.                                 |                   |
| <i>Mucuna</i> sp.                                  |                   |
| <i>Omphalea malayana</i> Merr.                     |                   |
| <i>Spatholobus macropterus</i> Miq.                | L4                |
| <i>Spatholobus</i> sp.                             | L5                |
| <i>Spenodesme triflora</i> Wight                   | L6                |
| <i>Strychnos</i> sp.                               | L7                |
| <i>Tetracera scandens</i> (L.) Merr.               | L8                |
| <i>Tetrastigma borneensis</i>                      |                   |
| <i>Uncaria cordata</i> (Lour.) Merr.               |                   |
| <i>Uncaria</i> sp.                                 | L9                |
| <i>Uvaria sorzogonensis</i> (Presl)                | L10               |
| <i>Uvaria</i> sp.                                  |                   |
| <i>Wilughbeia</i> sp.                              | L11               |
| <i>Logged forest</i>                               |                   |
| <i>Aglaia borneensis</i> Merr.                     | L1                |
| <i>Artabotrys roseus</i> Boerl.                    | L2                |
| <i>Bauhinia integrifolia</i> (Roxb.) Benth.        |                   |
| <i>Bauhinia</i> sp.                                | L3                |
| <i>Caesalpinia latisiliqua</i> (Cav.) Hattink      | L4                |
| <i>Caesalpinia oppositifolia</i> Hattink           | L5                |
| <i>Caesalpinia parviflora</i> Prain ex King        | L6                |
| <i>Caesalpinia scortechinii</i> (F.Muell.) Hattink | L7                |
| <i>Caesalpinia</i> sp.                             |                   |
| <i>Celastrus</i> sp.                               |                   |



|                                           |     |
|-------------------------------------------|-----|
| <i>Cissus hastata</i> Miq.                |     |
| <i>Combretum nigrescens</i> King          | L8  |
| <i>Erycibe borneensis</i> (Merr.) Hoogl.  | L9  |
| <i>Jacquemontia tomentella</i> Hallier f. |     |
| <i>Luvunga heterophylla</i> Merr.         |     |
| <i>Mucuna</i> sp.                         |     |
| <i>Omphalea malayana</i> Merr.            | L10 |
| <i>Spatholobus macropterus</i> Miq.       | L11 |
| <i>Spatholobus</i> sp.                    | L12 |
| <i>Spenodesme triflora</i> Wight          | L13 |
| <i>Strychnos ignatii</i>                  | L14 |
| <i>Strychnos</i> sp.                      | L15 |
| <i>Tetracera scandens</i> (L.) Merr.      | L16 |
| <i>Tetrastigma borneensis</i>             |     |
| <i>Tetrastigma</i> sp.                    |     |
| <i>Uncaria cordata</i> (Lour.) Merr.      |     |
| <i>Uncaria</i> sp.                        | L17 |
| <i>Uvaria sorzogonensis</i> (Presl)       | L18 |
| <i>Uvaria</i> sp.                         | L19 |
| <i>Wilughbeia</i> sp.                     | L20 |

**Table S2.** Proportions of each of the types of climbing mechanisms for lianas and families in the case of trees present within the two types of forests surveyed.

| Lianas         | <b>Tendrils</b> | <b>Scramblers</b> | <b>Twiners</b> |
|----------------|-----------------|-------------------|----------------|
| <b>Logged</b>  | 0.22            | 0.32              | 0.46           |
| <b>Primary</b> | 0.03            | 0.26              | 0.67           |

| Trees          | <b>Euphorbiaceae</b> | <b>Dipterocarpaceae</b> | <b>Meliaceae</b> | <b>Rubiaceae</b> |
|----------------|----------------------|-------------------------|------------------|------------------|
| <b>Logged</b>  | 0.13                 | 0.14                    |                  | 0.18             |
| <b>Primary</b> | 0.13                 | 0.12                    | 0.12             | 0.02             |

**Table S3.** Characterization of the topology of plant-liana networks in primary and logged forests. “Null model” were obtained using 1000 permutations of the Patefield null model [4].

\*: < 0.05, \*\*: < 0.01, \*\*\*:

| <b>LOGGED</b>                                 |                                 |                                   |          |                     |
|-----------------------------------------------|---------------------------------|-----------------------------------|----------|---------------------|
|                                               | <b>Observed<br/>(mean ± SE)</b> | <b>Null Model (mean<br/>± SE)</b> | <b>z</b> | <b>P</b>            |
| <b>Weighted<br/>Connectance</b>               | 0.18 ± 0.03                     | 0.21 ± 0.03                       | -2.96    | <b>0.003**</b>      |
| <b>Nestedness (weighted<br/>NODF)</b>         | 23.02 ± 6.47                    | 26.70 ± 5.21                      | -1.69    | <b>0.04*</b>        |
| <b>Complementary<br/>specialization (H2')</b> | 0.33 ± 0.08                     | 0.19 ± 0.03                       | 6.16     | <b>&lt;0.001***</b> |
| <b>PRIMARY</b>                                |                                 |                                   |          |                     |
| <b>Weighted Connectance</b>                   | 0.16 ± 0.03                     | 0.19 ± 0.02                       | -2.99    | <b>0.003**</b>      |
| <b>Nestedness (weighted<br/>NODF)</b>         | 16.28 ± 7.40                    | 19.39 ± 7.94                      | -3.86    | <b>&lt;0.001***</b> |
| <b>Complementary<br/>specialization (H2')</b> | 0.35 ± 0.08                     | 0.21 ± 0.03                       | 7.24     | <b>&lt;0.001***</b> |

**Table S4.** Selection of best models evaluating the effect of logging, species richness and abundance on three descriptors of tree-liana network topology at the network level and two at the guild level, analysed by means of GLMMs. Factor significance is based on Likelihood Ratio Tests. \*: < 0.05, \*\*: < 0.01, \*\*\*:

|                              | <b>Metric</b>                                       | <b>Variable</b>           | <b>Estimate ± S.E.</b> | <b>z-value</b>  |
|------------------------------|-----------------------------------------------------|---------------------------|------------------------|-----------------|
| <i>Network level metrics</i> | <b>Weighted Connectance</b>                         | Intercept                 | -1.69 ± 0.06           | -28.95***       |
|                              |                                                     | <b>Logging (primary)</b>  | <b>-0.21 ± 0.05</b>    | <b>-3.85***</b> |
|                              |                                                     | <b>Liana sps richness</b> | <b>-0.06 ± 0.03</b>    | <b>-2.46*</b>   |
|                              | <b>Nestedness (weighted NODF)</b>                   | Intercept                 | 2.99 ± 0.07            | 42.31***        |
|                              |                                                     | <b>Tree sps richness</b>  | <b>-0.19 ± 0.09</b>    | <b>-2.04*</b>   |
|                              |                                                     | <b>Liana abundance</b>    | <b>0.25 ± 0.09</b>     | <b>2.72**</b>   |
|                              | <b>Complementary specialization (H<sub>2</sub>)</b> | Intercept                 | 0.31 ± 0.03            | 8.89***         |
|                              |                                                     | <b>Logging (primary)</b>  | <b>0.07 ± 0.03</b>     | <b>2.35*</b>    |
|                              |                                                     | Tree sps richness         | 0.02 ± 0.02            | 1.25            |
| <i>Guild level metrics</i>   | <b>Tree specialization</b>                          | Intercept                 | 0.14 ± 0.03            | 4.48***         |
|                              |                                                     | Tree sps richness         | 0.02 ± 0.01            | 1.85            |
|                              |                                                     | <b>Liana abundance</b>    | <b>-0.03 ± 0.01</b>    | <b>-2.80**</b>  |
|                              | <b>Liana specialization</b>                         | Intercept                 | 0.15 ± 0.02            | 9.31***         |
|                              |                                                     | Liana abundance           | -0.03 ± 0.02           | -1.85           |

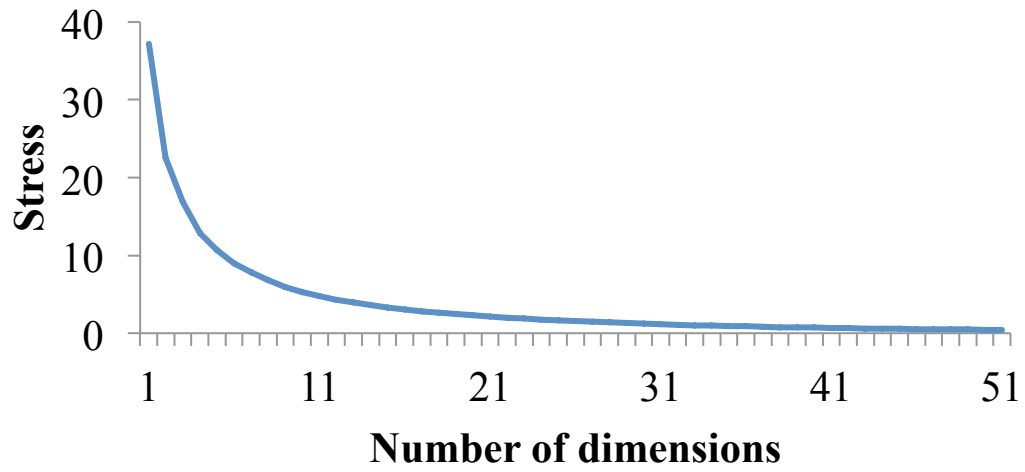

**Figure S1.** Relationship between number of dimensions used in the non-metric multidimensional analysis (NMDS) and output stress values.

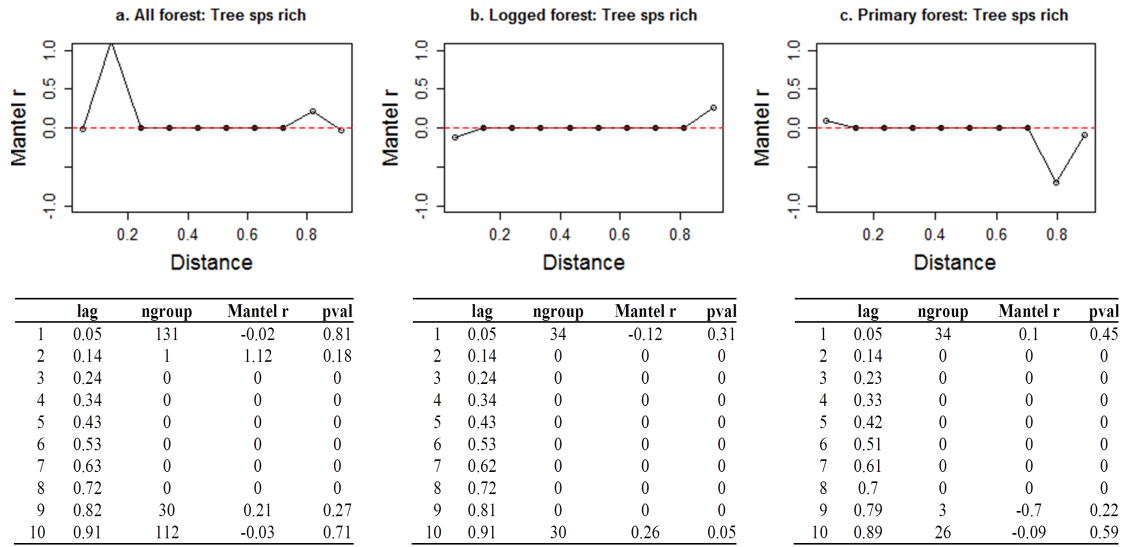

**Figure S2.** Partial Mantel correlograms and Mantel r value tables for the linear regression residuals of tree species richness against locations for (a) the whole sample, (b) within logged forests and (c) primary forest.

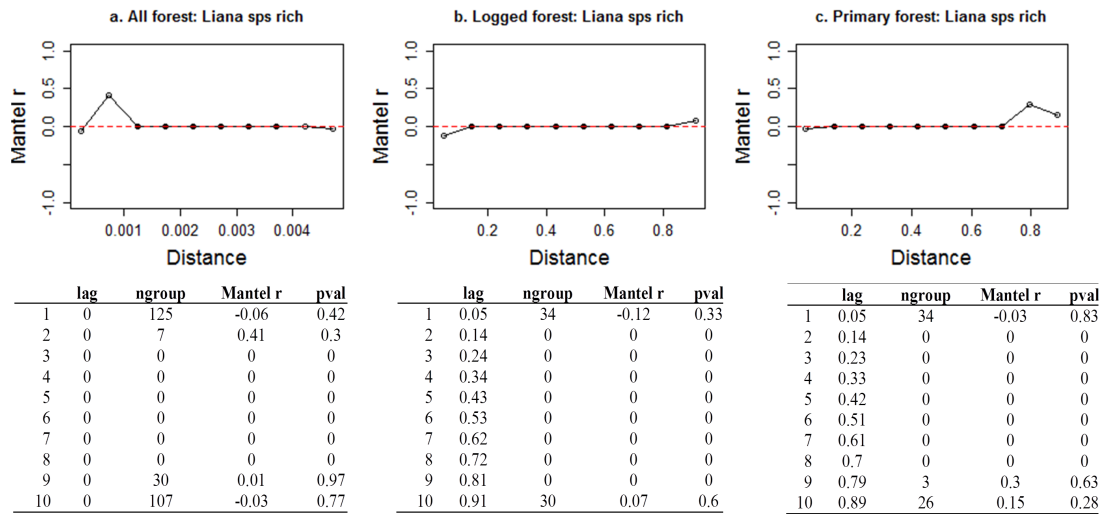

**Figure S3.** Partial Mantel correlograms and Mantel r value tables for the linear regression residuals of liana species richness against locations for (a) the whole sample, (b) within logged forests and (c) primary forest.

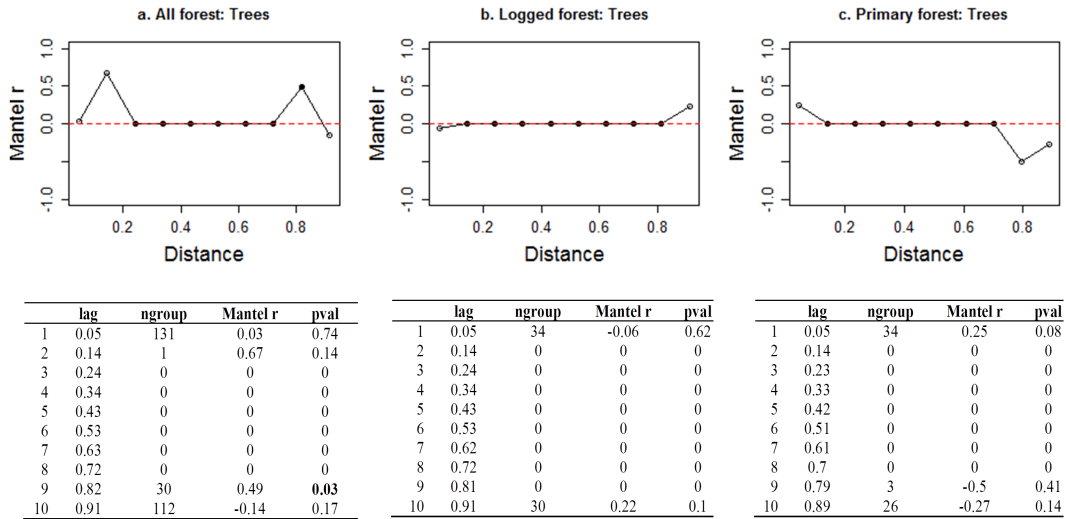

**Figure S4.** Partial Mantel correlograms and Mantel r value tables for the linear regression residuals of tree species composition against locations for (a) the whole sample, (b) within logged forests and (c) primary forest.

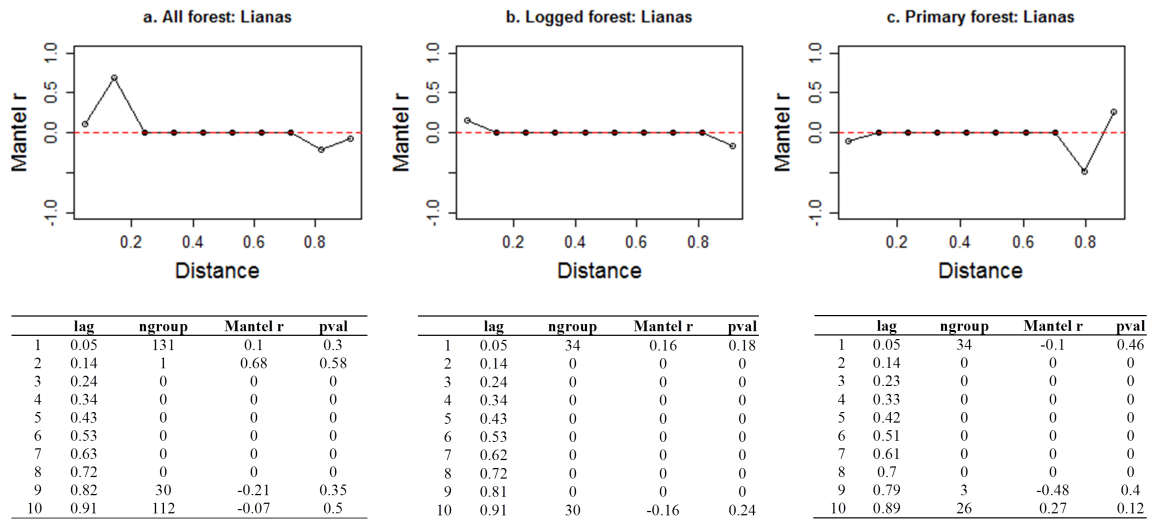

**Figure S4.** Partial Mantel correlograms and Mantel r value tables for the linear regression residuals of liana species composition against locations for (a) the whole sample, (b) within logged forests and (c) primary forest.

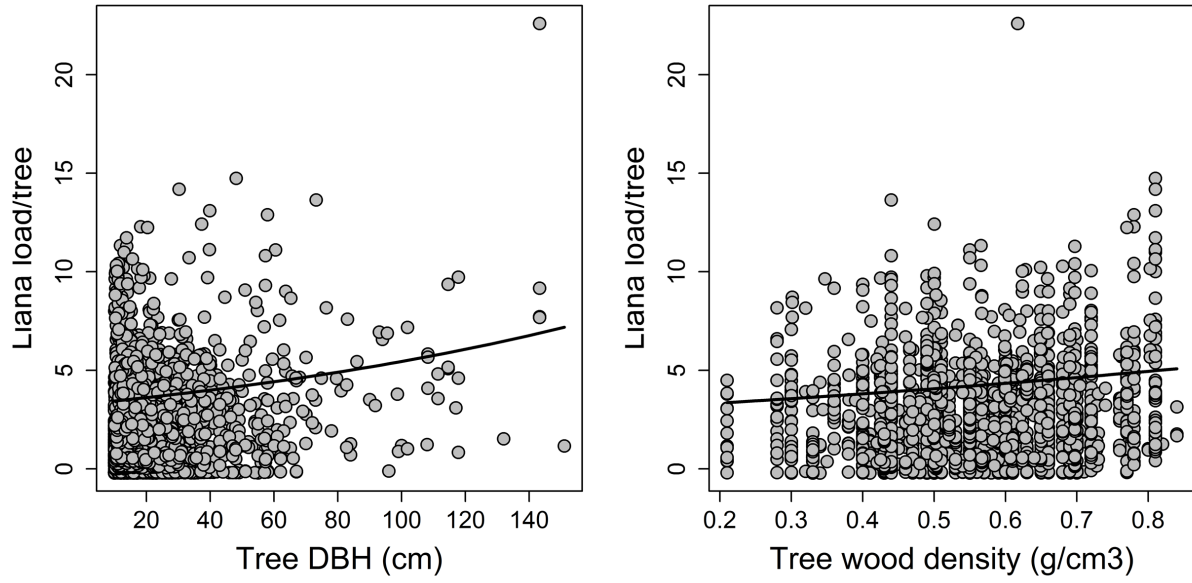

**Figure S6.** Partial residual plots showing results of GLMM models analysing the effect of tree host DBH and tree host wood density on liana load per tree.



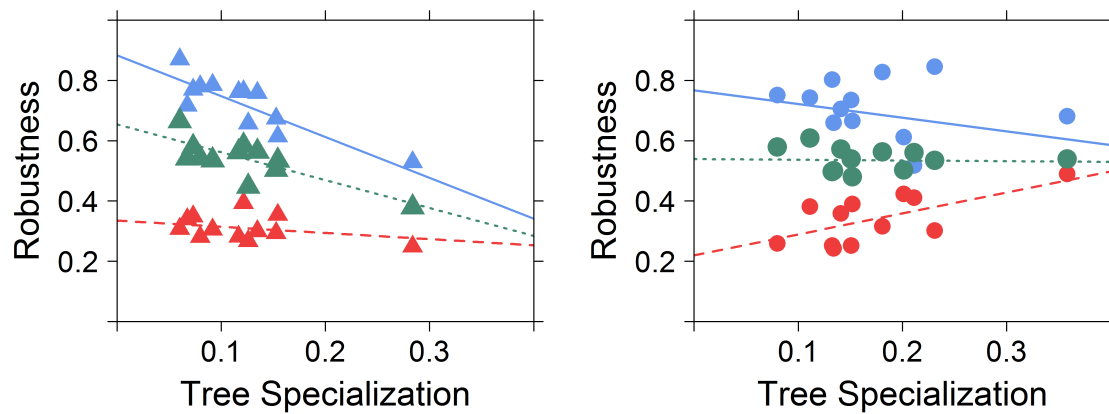

**Figure S7.** Partial residual plots showing how tree specialization relates to network robustness to the local species loss of selected host trees in logged (triangles) and primary (circles) forests and under three species loss scenarios. Blue points and solid lines represent the rare species loss scenario, green points and dotted lines the random species loss scenario and red points and dashed lines the connected species loss scenario.

## References

1. Schnitzer, S.A., DeWalt, S.J., and Chave, J. (2006). Censusing and Measuring Lianas: A Quantitative Comparison of the Common Methods. *Biotropica* 38, 581-591.
2. Chave, J., Andalo, C., Brown, S., Cairns, M.A., Chambers, J.Q., Eamus, D., Folster, H., Fromard, F., Higuchi, N., Kira, T., et al. (2005). Tree allometry and improved estimation of carbon stocks and balance in tropical forests. *Oecologia* 145, 87-99.
3. Zanne, A.E., Lopez-Gonzalez, G., Coomes, D.A., Ilic, J., Jansen, S., Lewis, S.L., Miller, R.B., Swenson, N.G., Wiemann, M.C., and Chave, J. (2009). Data from: Towards a worldwide wood economics spectrum. Dryad Digital Repository. doi:10.5061/dryad.234. .
4. Patefield, W.M. (1981). An efficient method of generating random RxC tables with given row and column totals. *Appl Stat* 30, 91-97.
